# Supplementary material for: One-year pilot study on the effects of nitisinone on melanin in patients with OCA-1B
Source: JCI journal article supplement (doi:10.1172/jci.insight.124387), 2019-01-23
Supplement: sd1 [file 1]

## SUPPLEMENTARY TABLES

|                                                                                                                                                                                                                                                                                                                                                                                                                                                                                                                                                                                                                                                                                                                                                                                                                                                                                                                                                                                                                                                                                                                                                                                                                                                                                                                                                                       |
|-----------------------------------------------------------------------------------------------------------------------------------------------------------------------------------------------------------------------------------------------------------------------------------------------------------------------------------------------------------------------------------------------------------------------------------------------------------------------------------------------------------------------------------------------------------------------------------------------------------------------------------------------------------------------------------------------------------------------------------------------------------------------------------------------------------------------------------------------------------------------------------------------------------------------------------------------------------------------------------------------------------------------------------------------------------------------------------------------------------------------------------------------------------------------------------------------------------------------------------------------------------------------------------------------------------------------------------------------------------------------|
| <p><b>INCLUSION CRITERIA:</b></p> <ol style="list-style-type: none"> <li>1. Age ≥ 18 years</li> <li>2. Ability to understand and sign consent</li> <li>3. Normal renal and liver functions, platelet counts (no greater than grade 1 as defined by the Common Terminology Criteria for Adverse Events (CTCAE))</li> <li>4. Negative pregnancy test (screening, enrollment, study visits) for females</li> <li>5. Two effective methods of contraception while on NTBC</li> <li>6. Signs and symptoms of OCA1b (defined in text)</li> </ol>                                                                                                                                                                                                                                                                                                                                                                                                                                                                                                                                                                                                                                                                                                                                                                                                                            |
| <p><b>EXCLUSION CRITERIA:</b></p> <ol style="list-style-type: none"> <li>1. Pregnant or breast-feeding</li> <li>2. Male AND a definitive mutation in <i>OA1</i> (<i>GPR143</i>)</li> <li>3. Any of the following abnormal laboratory tests: serum potassium &lt; 3.0 mEq/L; serum creatin kinase &gt; 500 U/L; hemoglobin &lt; 10.0 g/dL; white blood cell count &lt; 3.0 k/μL; plasma tyrosine &gt; 150 μM; ESR &gt; 100 mm/h; and/or serum T4 &gt; 15 μg/dL or &lt; 4 μg/dL</li> <li>4. Chronic keratopathy</li> <li>5. Current malignancy</li> <li>6. Open skin lesions</li> <li>7. Diet that deliberately increases protein intake to disproportionate levels (e.g., Atkins diet).</li> <li>8. Uncontrolled hypertension (systolic blood pressure &gt; 180 mmHg or diastolic blood pressure &gt; 95 mm Hg)</li> <li>9. Chronic ocular disease that may confound the results of visual tests (e.g., macular degeneration, cataract of possible visual significance, uncontrolled glaucoma).</li> <li>10. Drinks &gt; the equivalent of 2 glasses of wine/day or a history of alcohol abuse</li> <li>11. Liver disease or live &gt; 3 cm below the right costal margin</li> <li>12. Muscle disease</li> <li>13. Medication known to cause elevated liver function (e.g., HMG Co-A reductase inhibitors, tetracycline, amiodarone, chronic acetaminophen)</li> </ol> |

**Table S1:** Inclusion and exclusion criteria

| System Organ Class<br>Preferred Term                      | Number of Events<br>N=10<br>N(%) |
|-----------------------------------------------------------|----------------------------------|
| Participants enrolled                                     | 5                                |
| Participants with at least one adverse event <sup>a</sup> | 5 (100%)                         |
| Blood and lymphatic system disorders <sup>b</sup>         | 1 (10%)                          |
| Anaemia                                                   | 1 (10%)                          |

| <b>System Organ Class<br/>Preferred Term</b>                                     | <b>Number of Events<br/>N=10<br/>N(%)</b> |
|----------------------------------------------------------------------------------|-------------------------------------------|
| Cardiac disorders <sup>b</sup>                                                   | 1 (10%)                                   |
| Palpitations                                                                     | 1 (10%)                                   |
| Gastrointestinal disorders <sup>b</sup>                                          | 2 (20%)                                   |
| Dyspepsia                                                                        | 1 (10%)                                   |
| Gastrooesophageal reflux disease                                                 | 1 (10%)                                   |
| General disorders and administration site conditions <sup>b</sup>                | 1 (10%)                                   |
| Chest pain                                                                       | 1 (10%)                                   |
| Infections and infestations <sup>b</sup>                                         | 1 (10%)                                   |
| Bronchitis                                                                       | 1 (10%)                                   |
| Investigations <sup>b</sup>                                                      | 1 (10%)                                   |
| Neurological examination abnormal                                                | 1 (10%)                                   |
| Musculoskeletal and connective tissue disorders <sup>b</sup>                     | 1 (10%)                                   |
| Pain in extremity                                                                | 1 (10%)                                   |
| Neoplasms benign, malignant and unspecified (incl cysts and polyps) <sup>b</sup> | 1 (10%)                                   |
| Haemangioma                                                                      | 1 (10%)                                   |
| Nervous system disorders <sup>b</sup>                                            | 1 (10%)                                   |
| Dizziness                                                                        | 1 (10%)                                   |

**Table S2:** Reported treatment-emergent adverse events. <sup>a</sup>Denominator is the number of participants enrolled. <sup>b</sup>Denominator is the number of events.

|                                | Baseline     | Change at Month 12 |
|--------------------------------|--------------|--------------------|
| <b>Total Score<sup>a</sup></b> |              |                    |
| N                              | 5            | 5                  |
| Mean (SD)                      | 73.7 (4.99)  | 5.1 (3.32)         |
| Median                         | 73.3         | 5.5                |
| Range (Min, Max)               | 67.8, 80.5   | 0.6, 8.6           |
| <b>General Health</b>          |              |                    |
| N                              | 5            | 5                  |
| Mean (SD)                      | 82.0 (10.06) | 3.0 (9.59)         |
| Median                         | 77.5         | 0.0                |
| Range (Min, Max)               | 77.5, 100.0  | -5.0, 17.5         |
| <b>General Vision</b>          |              |                    |
| N                              | 5            | 5                  |
| Mean (SD)                      | 54.0 (16.36) | 15.0 (21.21)       |
| Median                         | 60.0         | 0.0                |
| Range (Min, Max)               | 35.0, 75.0   | 0.0, 45.0          |
| <b>Ocular Pain</b>             |              |                    |
| N                              | 5            | 5                  |
| Mean (SD)                      | 82.5 (20.92) | 15.0 (16.30)       |
| Median                         | 87.5         | 12.5               |
| Range (Min, Max)               | 50.0, 100.0  | 0.0, 37.5          |
| <b>Near Activities</b>         |              |                    |
| N                              | 5            | 5                  |
| Mean (SD)                      | 70.8 (7.80)  | 4.2 (9.32)         |
| Median                         | 70.8         | 4.2                |
| Range (Min, Max)               | 58.3, 79.2   | -8.3, 16.7         |

|                            | Baseline     | Change at<br>Month 12 |
|----------------------------|--------------|-----------------------|
| <b>Distance Activities</b> |              |                       |
| N                          | 5            | 5                     |
| Mean (SD)                  | 59.2 (17.78) | 2.0 (13.43)           |
| Median                     | 58.3         | -6.8                  |
| Range (Min, Max)           | 41.7, 79.2   | -8.3, 16.7            |
| <b>Social Functioning</b>  |              |                       |
| N                          | 5            | 5                     |
| Mean (SD)                  | 81.7 (16.03) | -1.7 (3.73)           |
| Median                     | 83.3         | 0.0                   |
| Range (Min, Max)           | 58.3, 100.0  | -8.3, 0.0             |
| <b>Mental Health</b>       |              |                       |
| N                          | 5            | 5                     |
| Mean (SD)                  | 70.0 (5.00)  | 4.0 (6.52)            |
| Median                     | 70.0         | 0.0                   |
| Range (Min, Max)           | 65.0, 75.0   | 0.0, 15.0             |
| <b>Role Difficulties</b>   |              |                       |
| N                          | 5            | 5                     |
| Mean (SD)                  | 63.8 (14.25) | 3.8 (19.06)           |
| Median                     | 62.5         | 0.0                   |
| Range (Min, Max)           | 50.0, 81.3   | -18.8, 31.3           |
| <b>Dependency</b>          |              |                       |
| N                          | 5            | 5                     |
| Mean (SD)                  | 80.0 (8.15)  | 3.8 (11.35)           |
| Median                     | 81.3         | 6.3                   |

|                          | Baseline     | Change at Month 12 |
|--------------------------|--------------|--------------------|
| Range (Min, Max)         | 68.8, 87.5   | -12.5, 18.8        |
| <b>Driving</b>           |              |                    |
| N                        | 5            | 5                  |
| Mean (SD)                | 83.3 (15.59) | -10.0 (16.03)      |
| Median                   | 83.3         | -8.3               |
| Range (Min, Max)         | 58.3, 100.0  | -33.3, 8.3         |
| <b>Color Vision</b>      |              |                    |
| N                        | 5            | 5                  |
| Mean (SD)                | 100.0 (0.00) | 0.0 (0.00)         |
| Median                   | 100.0        | 0.0                |
| Range (Min, Max)         | 100.0, 100.0 | 0.0, 0.0           |
| <b>Peripheral Vision</b> |              |                    |
| N                        | 5            | 5                  |
| Mean (SD)                | 65.0 (13.69) | 20.0 (11.18)       |
| Median                   | 75.0         | 25.0               |
| Range (Min, Max)         | 50.0, 75.0   | 0.0, 25.0          |

Table S3: Summary of VFQ-39 total and sub-scale scores.

# SUPPLEMENTARY FIGURES:

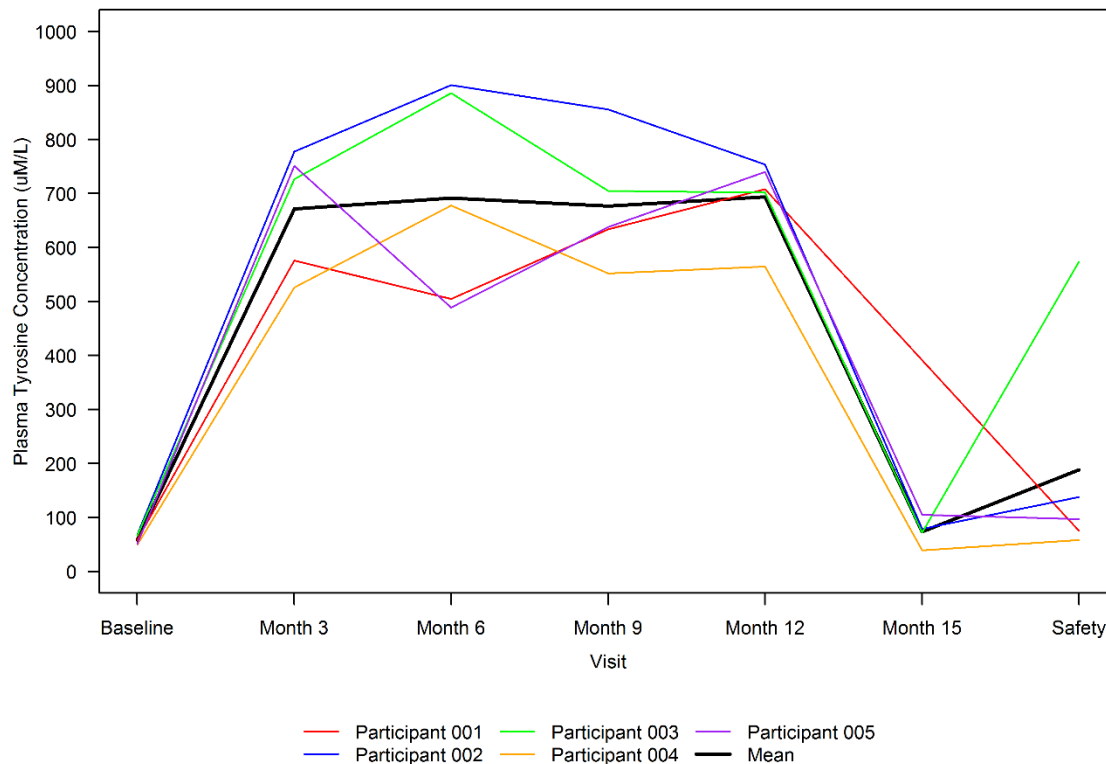

**Figure S1: Plasma tyrosine concentration over time by participant and overall.** The colored lines correspond to individual participant measurements and the black line corresponds to mean (n=4 for Month 15; n=5 otherwise) across all participants. Plasma concentrations of tyrosine peaked between Months 3 and 12 for participants and dropped to near-baseline level at Month 15, which is three months after investigational product (IP) discontinuation. One participant chose the option to re-start IP at Month 18, before discontinuing it approximately 1.5 months later and completing their safety follow-up visit, resulting in the spike in mean plasma nitisinone concentration at the safety follow-up visit.

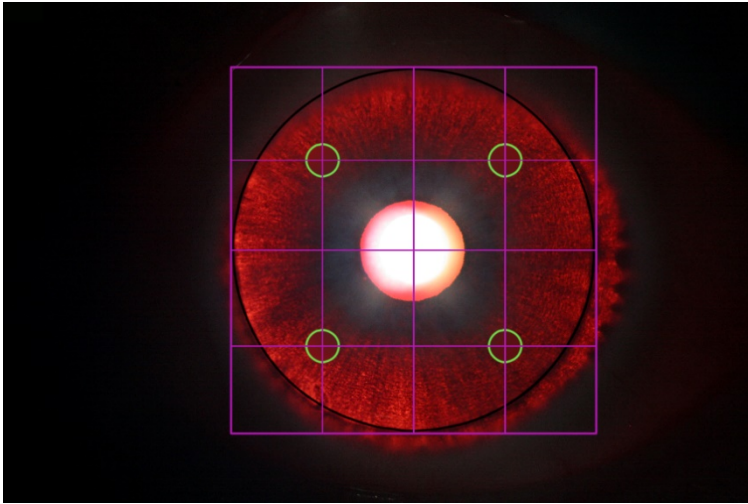

Figure S2: Diagram of the method of semiquantitative measurement of iris transillumination. The red signal from the circled areas were averaged to find a transillumination value for each image.
